# Supplementary material for: CO2 conversion to synthesis gas via DRM on the durable Al2O3/Ni/Al2O3 sandwich catalyst with high activity and stability
Source: Royal Society of Chemistry journal article supplement (doi:10.1039/c8gc00743h), 2018-01-01
Supplement: c8gc00743h1.pdf [file c8gc00743h1.pdf]

## Supporting Information

### **CO<sub>2</sub> conversion to synthesis gas *via* DRM on the durable Al<sub>2</sub>O<sub>3</sub>/Ni/Al<sub>2</sub>O<sub>3</sub> sandwich catalyst with high activity and stability**

Yu Zhao, Yunqing Kang, Hui Li\*, and Hexing Li\*

*Education Ministry Key Lab and Int. Joint Lab of Res. Chem., Shanghai University of  
Electric Power, Shanghai 200062, China.*

\*Corresponding authors. Tel: +86 21 64322272; Fax: +86 21 64322272.

*E-mail address:* [hexing-li@shnu.edu.cn](mailto:hexing-li@shnu.edu.cn) (H. X. Li)

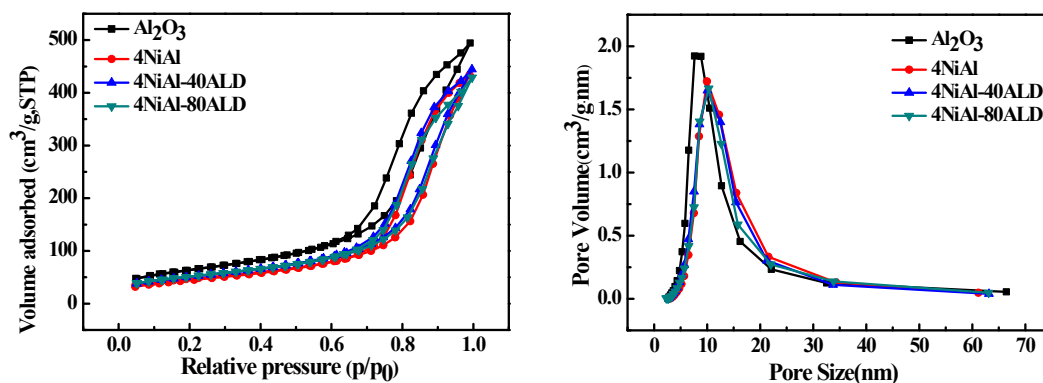

**Figure S1.** (Left) N<sub>2</sub> adsorption-desorption isotherms of different catalysts and (Right) pore size distribution calculated from the adsorption branch of BET isotherms.

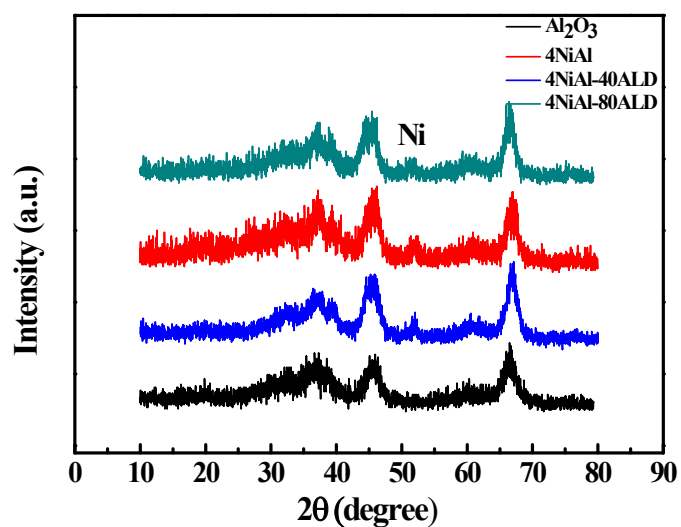

**Figure S2.** XRD patterns of different catalysts.

**Table S1.** CO<sub>2</sub> and CH<sub>4</sub> conversions on Ni/Al<sub>2</sub>O<sub>3</sub> catalysts with different Ni loadings<sup>[a]</sup>

| Catalysts                      | 1NiAl | 2NiAl | 4NiAl | 6NiAl |
|--------------------------------|-------|-------|-------|-------|
| Conversion/CH <sub>4</sub> (%) | 91.9  | 92.9  | 95.7  | 30.1  |
| Conversion/CO <sub>2</sub> (%) | 92.6  | 93.6  | 95.6  | 32.8  |

[a] Reaction conditions: reaction temperature = 800°C, volume ratio of CH<sub>4</sub> : CO<sub>2</sub> : N<sub>2</sub> = 1 : 1 : 1, GHSV = 300 L·g<sub>Ni</sub><sup>-1</sup>·h<sup>-1</sup>

**Table S2.** CO<sub>2</sub> and CH<sub>4</sub> conversions on 4NiAl catalysts achieved after calcinations at different temperatures<sup>[a]</sup>

| Catalysts                      | 4NiAl-700 | 4NiAl-800 | 4NiAl-900 |
|--------------------------------|-----------|-----------|-----------|
| Conversion/CH <sub>4</sub> (%) | 94.6      | 95.7      | 91.3      |
| Conversion/CO <sub>2</sub> (%) | 94.3      | 95.6      | 91.5      |

[a] Reaction conditions are given in Table S1.

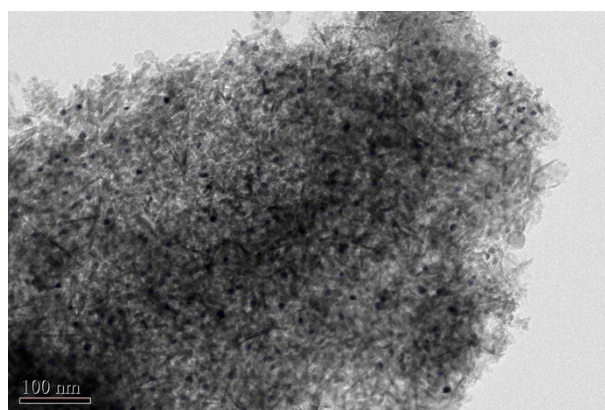**Figure S3.** Detail of particle size distribution for 4NiAl catalyst after H<sub>2</sub> reduction.
